# Supplementary material for: Synthesis of epoxides from aldehydes and tosylhydrazone salts catalysed by triphenylarsine: complete trans selectivity for all combinations of coupling partnersElectronic supplementary information (ESI) available: new compounds. See http://www.rsc.org/suppdata/cc/b2/b204252e/
Source: Royal Society of Chemistry journal article supplement (doi:10.1039/b204252e), 2002-06-19
Supplement: b204252e.doc [file b204252e.doc]

# **Supplementary data**

Synthesis of epoxides from aldehydes and tosylhydrazone salts catalysed by triphenylarsine: complete trans selectivity for all combinations of coupling partners

## Varinder K. Aggarwal,* Mamta Patel and John Studley

The following new compounds were prepared. All others are literature compounds.

**2-Cyclohexyl-3-(4-methylbenzenyl) oxirane**

Colourless oil isolated as the *trans isomer* only(61 mg, 85 %); R*f*= 0.55 (EtOAc / petrol 1:9); (Found C, 83.59; H, 9.58. C15H20O requires C, 83.28; H, 9.32 %); max (neat)/cm-1 2923 (CH2, CH3), 2851 (CH2, CH3), 1448 (CH2, CH3, alkyl); H (270 MHz, CDCl3) 1.04-2.03 (11H, m, 11  C*H*), 2.34 (3H, s, C*H*3), 2.75 (1 H, dd, *J* 2.1, 6.2 Hz, C*H*), 3.64 (1H, d, *J* 2.1 Hz, C*H*), 7.04-7.44 (4H, m, Ar*H)*; C (100 MHz, CDCl3) 21.2, 25.6, 25.8, 26.4, 29.1, 29.7, 40.6, 57.5, 67.3, 125.5, 129.2, 135.2, 137.7; *m/z* (CI) 217 (M+, 20%), 105 (100), (Found: M+, 217.1593. C15H20O requires M+, 217.1592).

**2-Cyclohexyl-3-(4-methoxybenzenyl) oxirane**

Colourless oil isolated as the *trans isomer* only(47 mg, 61 %); R*f*= 0.68 (EtOAc / petrol 1:4); (Found C, 77.80; H, 8.76. C15H20O2 requires C, 77.55; H, 8.68 %); max (neat)/cm-1 2926 (CH2, CH3), 2854 (OCH3), 1512 (Ar); H (270 MHz, CDCl3) 1.02-1.46 (6H, m, 6  C*H*), 1.58-2.08 (5H, m, 5  C*H*), 2.76 (1H, dd, *J* 2.3, 8.1 Hz, C*H*), 3.62 (1 H, d, *J* 2.3 Hz, C*H*), 3.79 (3H, s, OC*H*3), 6.82-6.94 (2H, m, Ar*H),* 7.13-7.24 (2H, m, Ar*H)*; C (100 MHz, CDCl3) 25.6, 25.8, 26.4, 29.1, 29.7, 40.5, 55.4, 57.3, 67.1, 113.9, 126.9, 130.2, 159.5; *m/z* (EI) 233 (M+, 30%), 121 (100), (Found: M+, 233.1544. C15H20O2 requires M+, 217.1542).
